# Supplementary material for: ‘Stay at home …’: exploring the impact of the COVID-19 public health response on sexual behaviour and health service use among men who have sex with men: findings from a large online survey in the UK
Source: HighWire-hosted journal article supplement (doi:10.1136/sextrans-2021-055039), 2021-09-20
Supplement: sextrans-2021-055039supp001_data_supplement.pdf [file sextrans-2021-055039supp001_data_supplement.pdf]

**Appendix 1 – Programme of research**

These surveys were conducted as part of the RiiSH programme of research (Reducing inequalities and improving Sexual Health). The first RiiSH online MSM survey was conducted in 2017 [14,15] and the present survey is the first of three planned rapid response surveys, designed to capture comparative data during the COVID-19 pandemic. The design of the 2020 survey was based on the 2017 survey.

**Appendix 2 – Lookback periods for 2017 and 2020 surveys**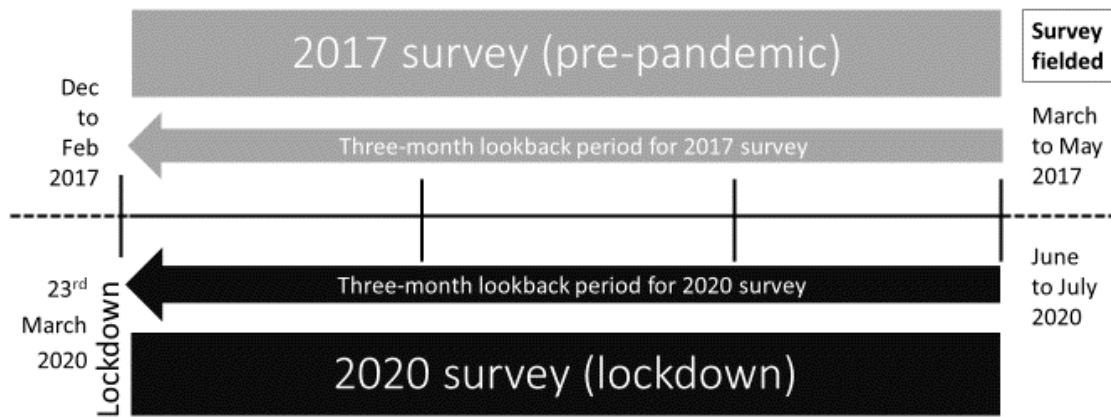

Figure created by co-authors

## Appendix 3 – Background characteristics, by recruitment site

|                                           | All –<br>n (%)<br>Median [IQR]<br>N=2018 | Social media –<br>n (%)<br>Median [IQR]<br>N=950 | Dating apps –<br>n (%)<br>Median [IQR]<br>N=1068 | p-value |
|-------------------------------------------|------------------------------------------|--------------------------------------------------|--------------------------------------------------|---------|
| <b>Cisgender man</b>                      | 1958 (97.0)                              | 919 (96.7)                                       | 1039 (97.3)                                      | .47     |
| <b>Age (in years)</b>                     | 40 [29–52]                               | 41 [29–53]                                       | 40 [30–50]                                       | .13     |
| <b>Ethnic group</b>                       |                                          |                                                  |                                                  | .001    |
| White                                     | 1781 (88.3)                              | 862 (90.7)                                       | 919 (86.0)                                       |         |
| Black                                     | 33 (1.6)                                 | 8 (0.8)                                          | 25 (2.3)                                         |         |
| Asian                                     | 109 (5.4)                                | 37 (3.9)                                         | 72 (6.7)                                         |         |
| Mixed / Other                             | 95 (4.7)                                 | 43 (4.5)                                         | 52 (4.9)                                         |         |
| <b>Country of residence</b>               |                                          |                                                  |                                                  | .44     |
| England                                   | 1744 (86.4)                              | 827 (87.1)                                       | 917 (85.9)                                       |         |
| Scotland                                  | 144 (7.1)                                | 63 (6.6)                                         | 81 (7.6)                                         |         |
| Wales                                     | 85 (4.2)                                 | 43 (4.5)                                         | 42 (3.9)                                         |         |
| Northern Ireland                          | 45 (2.2)                                 | 17 (1.8)                                         | 28 (2.6)                                         |         |
| <b>Born in the UK</b>                     | 1577 (78.1)                              | 753 (79.3)                                       | 824 (77.2)                                       | .25     |
| <b>Educated to degree level</b>           | 1174 (58.2)                              | 563 (59.3)                                       | 611 (57.3)                                       | .36     |
| <b>Employment status</b>                  |                                          |                                                  |                                                  | .06     |
| Employed / self-employed                  | 1165 (58.1)                              | 533 (56.2)                                       | 632 (59.8)                                       |         |
| Furlough, reduced hours,<br>redundancy    | 407 (20.3)                               | 183 (19.3)                                       | 224 (21.2)                                       |         |
| Student                                   | 116 (5.8)                                | 63 (6.6)                                         | 53 (5.0)                                         |         |
| Unemployed                                | 142 (7.1)                                | 77 (8.1)                                         | 65 (6.1)                                         |         |
| Retired / other                           | 176 (8.8)                                | 93 (9.8)                                         | 83 (7.9)                                         |         |
| <b>Last sex with a women <sup>§</sup></b> |                                          |                                                  |                                                  | .35     |
| Since lockdown                            | 71 (3.5)                                 | 29 (3.1)                                         | 42 (3.9)                                         |         |
| December 2019 to lockdown                 | 16 (0.8)                                 | 4 (0.4)                                          | 12 (1.1)                                         |         |
| January to December 2019                  | 35 (1.7)                                 | 16 (1.7)                                         | 19 (1.8)                                         |         |
| Before 2019                               | 332 (16.5)                               | 157 (16.5)                                       | 175 (16.4)                                       |         |
| Never                                     | 1564 (77.5)                              | 744 (78.3)                                       | 820 (76.8)                                       |         |
| <b>Household</b>                          |                                          |                                                  |                                                  |         |
| Living alone                              | 722 (35.8)                               | 305 (32.1)                                       | 417 (39.0)                                       | .001    |
| Living with partner(s)                    | 614 (30.4)                               | 382 (40.2)                                       | 232 (21.7)                                       | <.001   |
| <b>Currently single</b>                   | 1192 (59.1)                              | 428 (45.1)                                       | 764 (71.5)                                       | <.001   |
| <b>HIV positive</b>                       | 203 (10.1)                               | 98 (10.3)                                        | 105 (9.8)                                        | .72     |

<sup>§</sup> Including trans women

Table created by co-authors

**Appendix 4 – Unmet need for STI testing<sup>‡</sup> since lockdown, by English region of residence**

|                      | <b>Unmet need<br/>n (%)</b> | <b>p-value</b> |
|----------------------|-----------------------------|----------------|
| All England          | 148 (24.0)                  |                |
| <b>Region</b>        |                             | .53            |
| East Midlands        | 27 (26.7)                   |                |
| East of England      | 38 (27.3)                   |                |
| London               | 132 (22.4)                  |                |
| North East           | 13 (22.8)                   |                |
| North West           | 49 (28.8)                   |                |
| South East           | 60 (21.8)                   |                |
| South West           | 37 (27.6)                   |                |
| West Midlands        | 30 (23.4)                   |                |
| Yorkshire and Humber | 24 (18.8)                   |                |
| Don't know           | 6 (27.3)                    |                |

<sup>‡</sup> One or more new sex partners and / or multiple condomless anal sex partners, and no STI testing

Table created by co-authors

**Appendix 5 – Comparable background characteristics, by survey**

|                                 | <b>All –<br/>N=2874</b> | <b>2017 survey –<br/>N=1918</b> | <b>2020 survey –<br/>N=956</b> | <b>p-value</b> |
|---------------------------------|-------------------------|---------------------------------|--------------------------------|----------------|
|                                 | <b>Median [IQR]</b>     | <b>Median [IQR]</b>             | <b>Median [IQR]</b>            |                |
| <b>Age (in years)</b>           | 38 [29-48]              | 37 [28-48]                      | 40 [30-50]                     | <.001          |
|                                 | <b>n (%)</b>            | <b>n (%)</b>                    | <b>n (%)</b>                   |                |
| <b>Ethnic group</b>             |                         |                                 |                                | .02            |
| White                           | 2524 (88.4)             | 1700 (89.5)                     | 824 (86.2)                     |                |
| Black                           | 64 (2.2)                | 43 (2.3)                        | 21 (2.2)                       |                |
| Asian                           | 147 (5.1)               | 82 (4.3)                        | 65 (6.8)                       |                |
| Mixed / Other                   | 121 (4.2)               | 75 (3.9)                        | 46 (4.8)                       |                |
| <b>Country of residence</b>     |                         |                                 |                                | <.001          |
| England                         | 2581 (90.6)             | 1774 (93.7)                     | 807 (84.4)                     |                |
| Scotland                        | 92 (3.2)                | 12 (0.6)                        | 80 (8.4)                       |                |
| Wales                           | 147 (5.2)               | 106 (5.6)                       | 41 (4.3)                       |                |
| Northern Ireland                | 30 (1.1)                | 2 (0.1)                         | 28 (2.9)                       |                |
| <b>Born in the UK</b>           | 2251 (79.0)             | 1506 (79.6)                     | 745 (77.9)                     | .31            |
| <b>Educated to degree level</b> | 1525 (53.3)             | 965 (50.7)                      | 560 (58.6)                     | <.001          |
| <b>Currently single</b>         | 1869 (65.1)             | 1191 (62.3)                     | 678 (70.9)                     | <.001          |
| <b>HIV positive</b>             | 319 (11.1)              | 223 (11.7)                      | 96 (10.0)                      | .18            |

Table created by co-authors

**Appendix 6 – Evidence on the impact of the social distancing measures introduced due to the COVID-19 pandemic on sexual behaviour among MSM**

Nine out of ten gay and bisexual men (GBM) in a study in the United States (US) reported one or no sexual partners during this time;[18] in a Belgian study, the proportion of MSM reporting sex with casual partners decreased from 59% to 9%;[19] and an Australian study found only 16% of GBM continued having sex with casual partners.[17] By comparison, two fifths of MSM in an Israeli study continued meeting new casual sex partners, albeit fewer in number,[20] and high levels of sexual activity have been reported in another US study, along with increases in substance use and binge drinking.[21]
